# Supplementary material for: Cylindrical nanostructured MoS2 directly grown on CNT composites for lithium-ion batteries
Source: Royal Society of Chemistry journal article supplement (doi:10.1039/c4nr06348a), 2015-01-01
Supplement: c4nr06348a1.pdf [file c4nr06348a1.pdf]

## Electronic Supplementary Information

### **Cylindrical nanostructured MoS<sub>2</sub> directly grown on CNT composites for lithium ion batteries**

*HeeJoun Yoo<sup>†3</sup>, Anand P. Tiwari<sup>†1</sup>, JeongTaik Lee<sup>2</sup>, Doyoung Kim<sup>3</sup>, JongHyeok Park<sup>2</sup> and Hyoyoung Lee<sup>\*1</sup>*

1. Department of Chemistry, Sungkyunkwan University, 300 Cheoncheon-Dong, Jangan-Gu, Suwon, Gyeonggi-Do 440-746, South Korea  
E-mail: [hyoyoung@skku.edu](mailto:hyoyoung@skku.edu)
2. School of Chemical Engineering, Sungkyunkwan University, Suwon 440-746, Republic of Korea
3. Department of Energy Science, Sungkyunkwan University, 2066 Seoburo, Jangan-gu, Suwon, Gyeonggi-do 440-746, Republic of Korea

† Equally contributed

\* Corresponding Author: [hyoyoung@skku.edu](mailto:hyoyoung@skku.edu) (Prof. Hyoyoung Lee)

**In this Supplement, we present six figures that support results in the main text. The list is**

**Figure S1: X-ray photospectroscopy patterns of (a) MDGC-E and (b) MDGC-D.**

**Figure S2: Raman Spectra of (a) CNT (b) Sulfur coated CNT (c) MDGC-E and (d) MDGC- D samples.**

**Figure S3: TGA analysis of MDGC-E sample.**

**Figure S4: HRTEM of (a) MDGC-E and (b) MDGC-D samples.**

**Figure S5: Galvanostatic charge-discharge profile of MDGC-D.**

**Figure S6: Cycling performance of MDGC-D and corresponding charge discharge curve with different rate condition.**

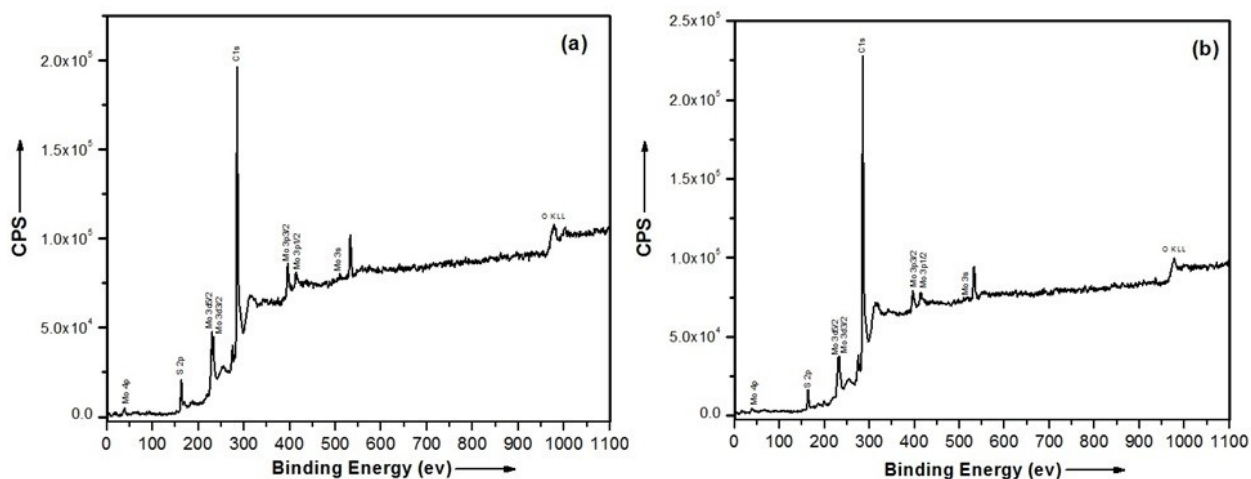

**Figure S1: XPS patterns of (a) MDGC-E and (b) MDGC-D:** It can be seen from Figures S1(a) and (b) that the sample contains the C, Mo and S elements. The calculated atomic ratio of Mo to S element is 1 to 2.14 and 1 to 2.20 for MDGC-E and MDGC-D samples, respectively, approaching the theoretical value of  $\text{MoS}_2$ . The high-resolution of C1s can be seen apart from the “C = C” bond.

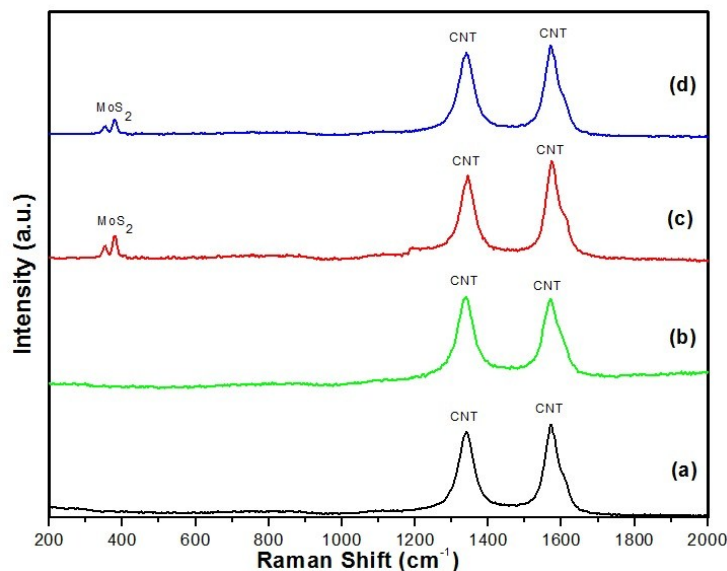

**Figure S2: Raman Spectra of (a) CNT (b) Sulfur coated CNT (c) MDGC-E and (d) MDGC-D samples:** It is evident from the Raman spectra S2(C) and S2 (d) that  $\text{MoS}_2$  sheets have well

layered structure on the CNT surfaces. It is also illustrated that the D to G peak ratio of sulfur coated CNT increases with respect to bare CNT due to sulfur created some defects on the CNT surfaces.

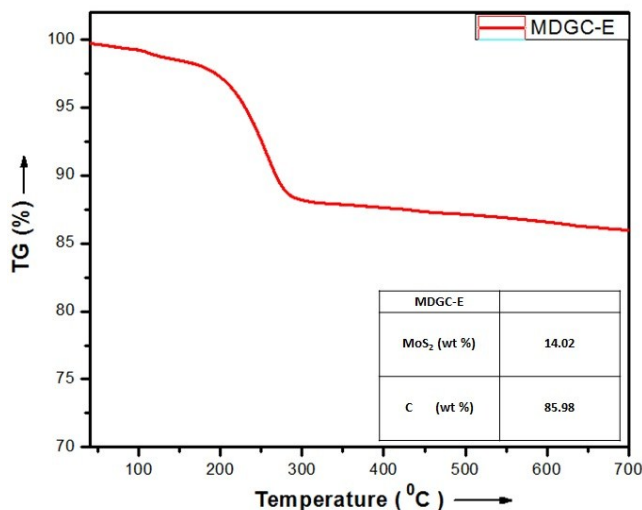

**Figure S3: TGA curve of MDGC-E:** The MDGC-E composite exhibits two weight losses. The first one appears at approximately between 230-250 °C, which can probably be attributed to the removal of oxygen-containing groups. The second is only one large continuous weight loss in the range of approximately 300-450 °C. This thermal behavior might be caused by the decomposition of the amorphous carbon and CNT, and oxidation of MoS<sub>2</sub> in the composites. The mass fraction of carbon and MoS<sub>2</sub> in the MDGC-E can be determined to be around 85.98 wt% and 14.02 wt%, respectively, assuming the complete conversion from MoS<sub>2</sub> to MoO<sub>3</sub>.

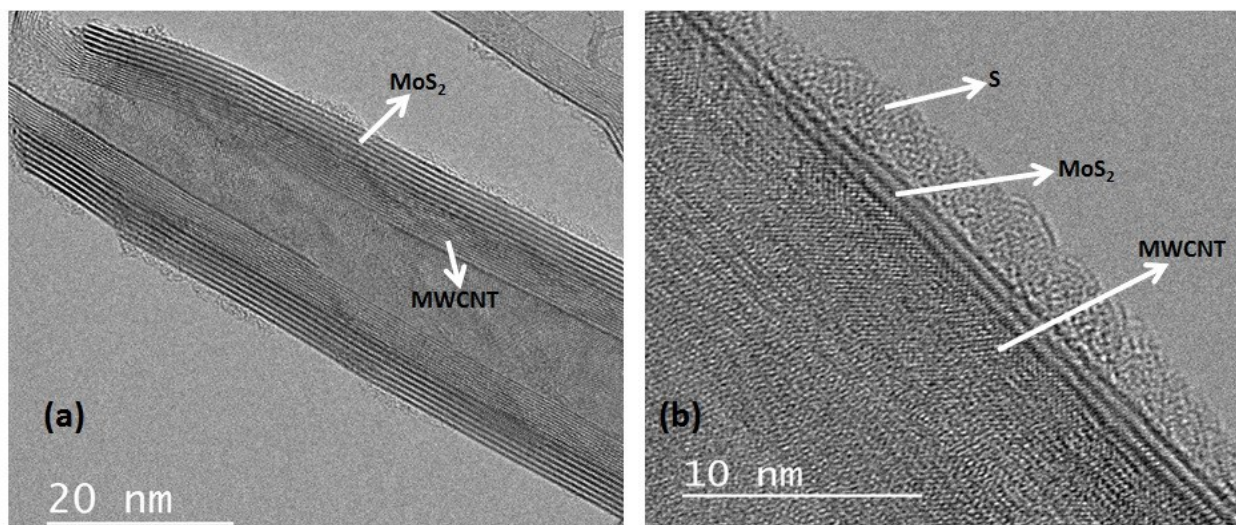

**Figure S4: HRTEM of (a) MDGC-E and (b) MDGC-D samples.** It can be clearly seen from Figures S4 (a) that MoS<sub>2</sub> sheets are well coated on the CNT surface. The d-values between the sheets are 0.62 nm which agrees with XRD analysis. It is illustrated from the Figures S4 (a) that the MDGC-E sample contains the 4-8 layers of MoS<sub>2</sub>. The amorphous phase of residual S can be seen in the MDGC-D sample (Figure S4 (b)).

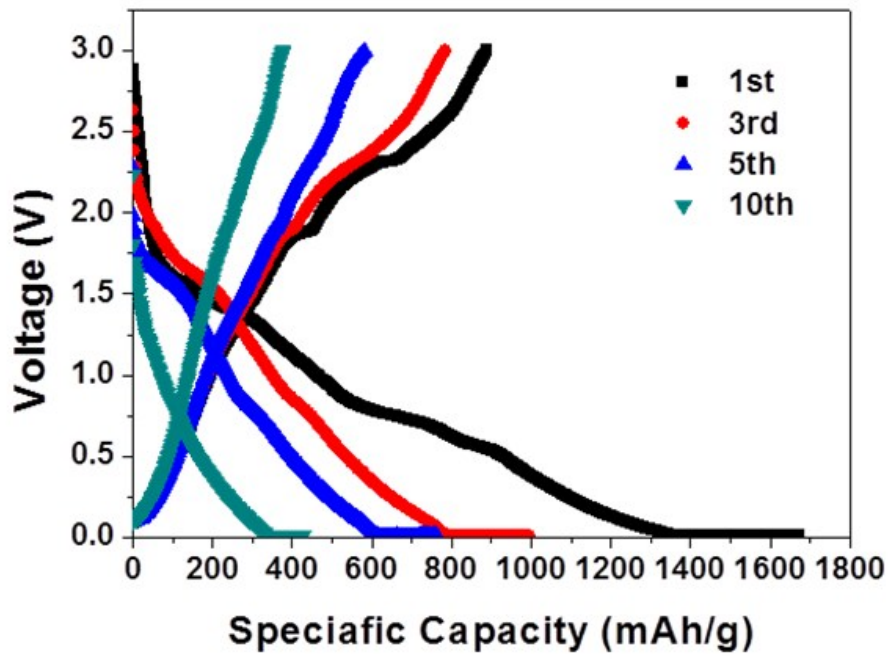

*Figure S5 Galvanostatic charge-discharge profile of MDGC-D*

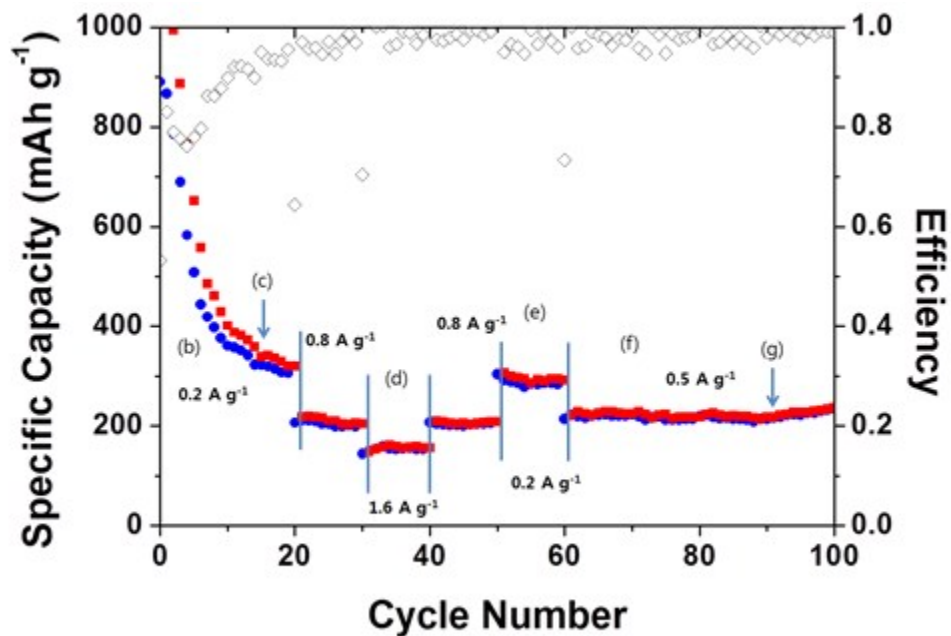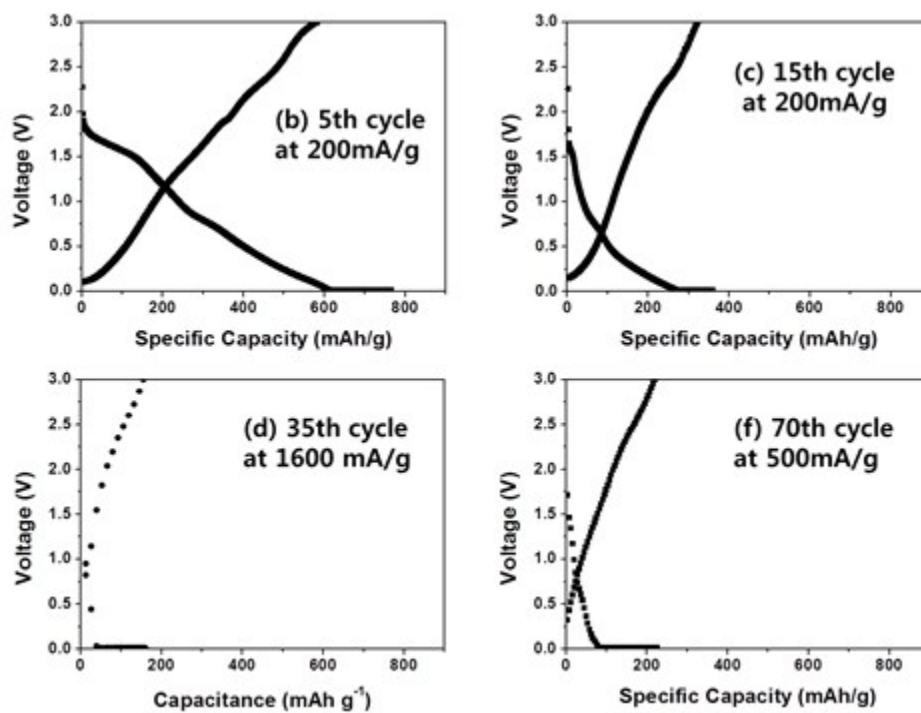

*Figure S6 Cycling performance of MDGC-D and corresponding charge discharge curve with different rate condition.*
